# Supplementary material for: Placenta-Derived Cell Therapy to Treat Patients With Respiratory Failure Due to Coronavirus Disease 2019
Source: PubMed Central journal article supplement — Crit Care Explor. 2020 Sep 15;2(9):e0207. doi: 10.1097/CCE.0000000000000207 (PMC7498138; doi:10.1097/cce.0000000000000207), 2020-09-15
Supplement: cc9-2-e0207-s001.pdf [file cc9-2-e0207-s001.pdf]

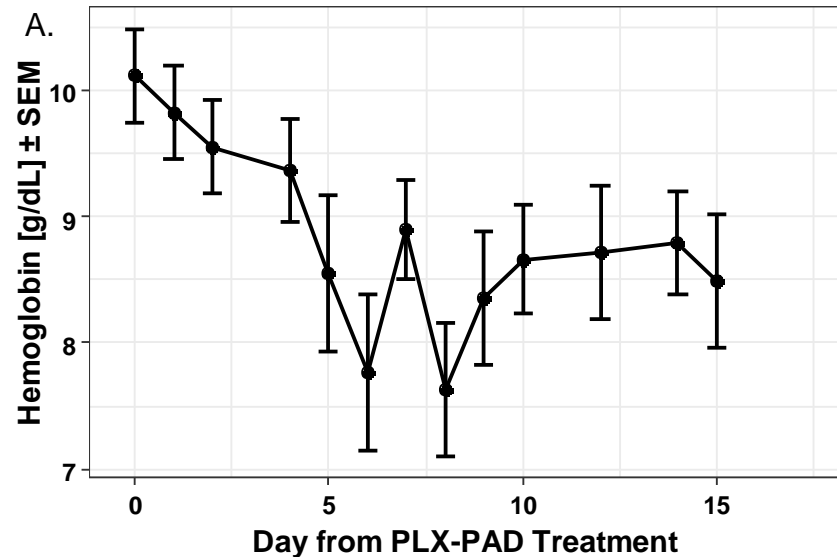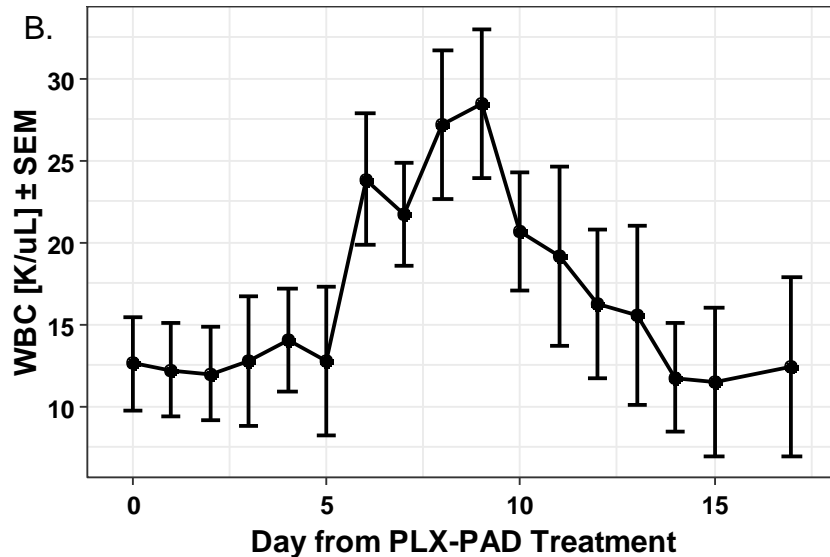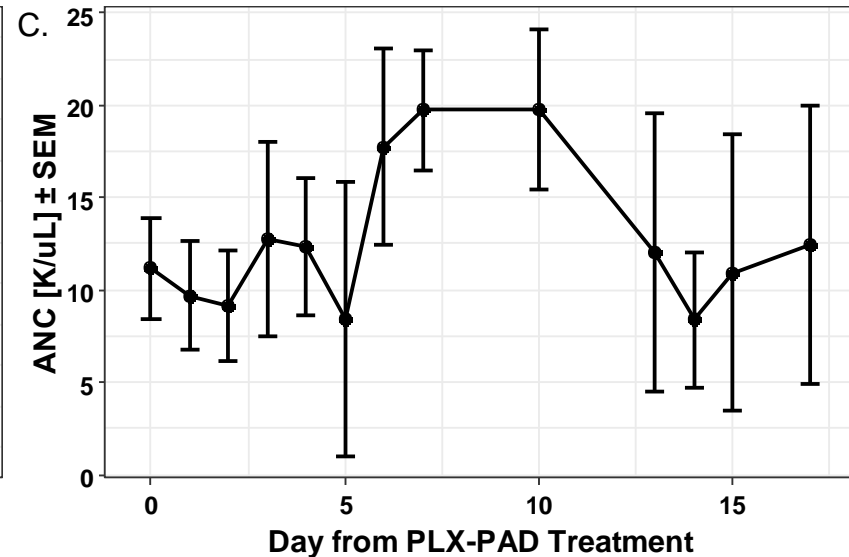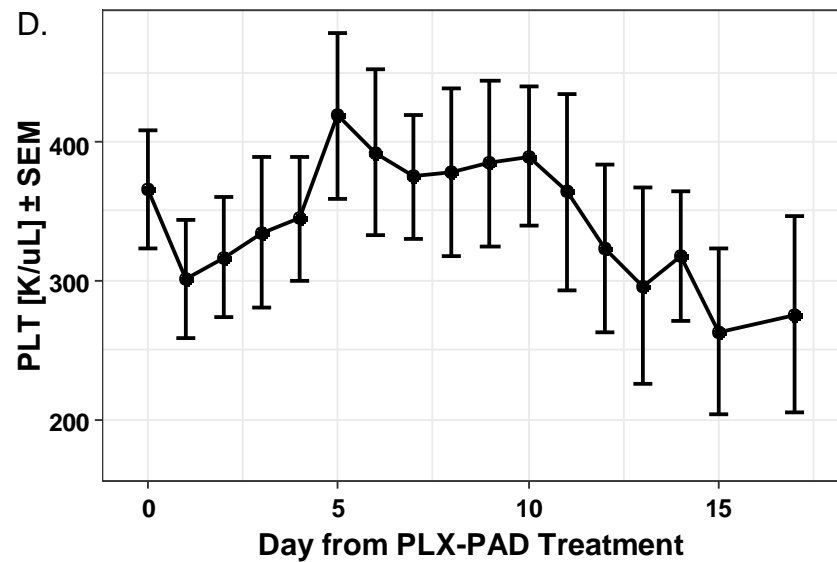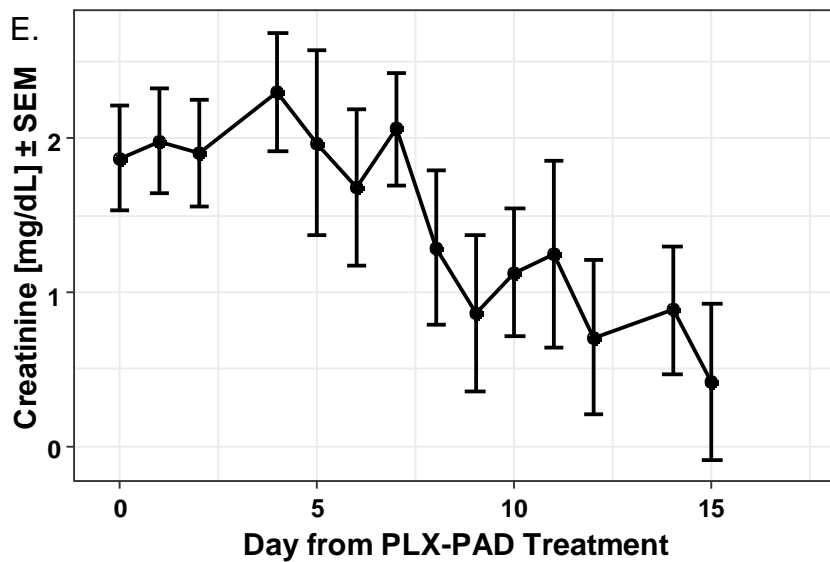

**F.**

| Parameter          | P-Values (Pairwise Comparisons) |          |           |
|--------------------|---------------------------------|----------|-----------|
|                    | Days 0-3                        | Days 0-5 | Days 0-14 |
| Hemoglobin [g/dL]  | n.s.                            | 1.53E-02 | 2.76E-03  |
| WBC [K/uL]         | n.s.                            | n.s.     | n.s.      |
| ANC [K/uL]         | n.s.                            | n.s.     | n.s.      |
| PLT [K/uL]         | n.s.                            | n.s.     | n.s.      |
| Creatinine [mg/dL] | n.s.                            | n.s.     | 3.24E-02  |
