# Supplementary figures and images for: Placenta-Derived Cell Therapy to Treat Patients With Respiratory Failure Due to Coronavirus Disease 2019
Source: PubMed Central journal article supplement — Crit Care Explor. 2020 Sep 15;2(9):e0207. doi: 10.1097/CCE.0000000000000207 (PMC7498138; doi:10.1097/cce.0000000000000207), 2020-09-15

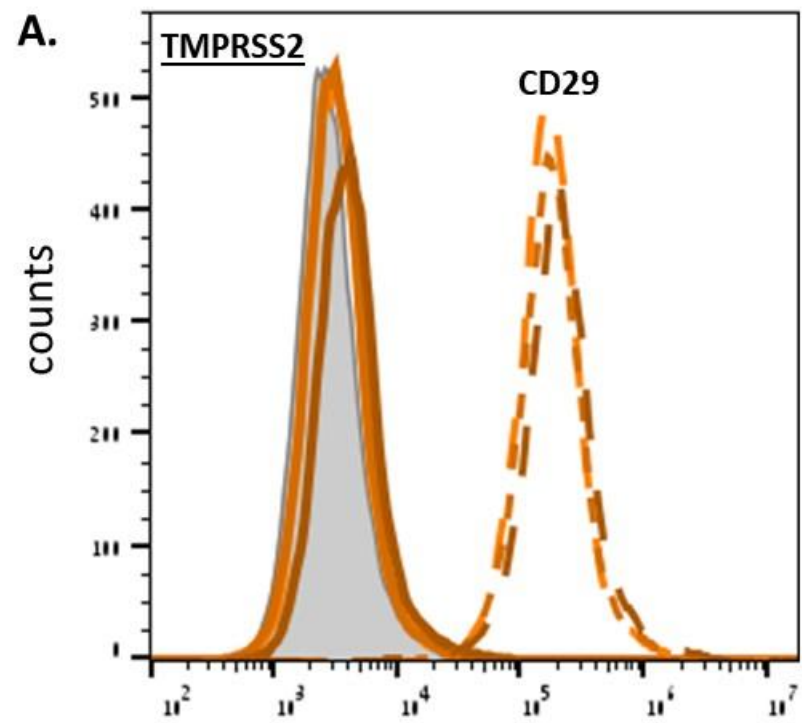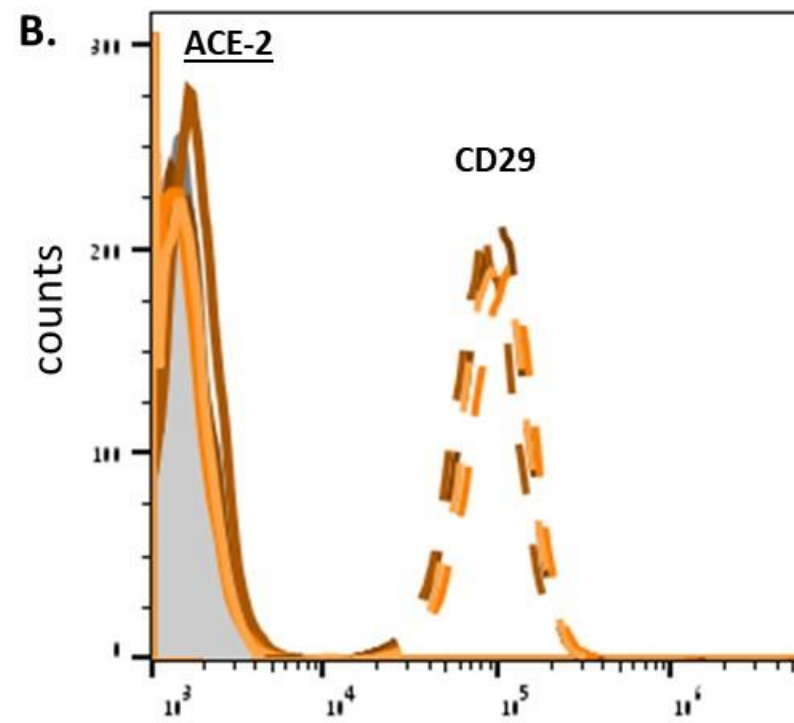

Supplement: cc9-2-e0207-s002.pdf [file cc9-2-e0207-s002.pdf]
